# Supplementary material for: The impact of chronic migraine: The Chronic Migraine Epidemiology and Outcomes (CaMEO) Study methods and baseline results
Source: PubMed Central journal article supplement — Cephalalgia. 2015 Jun;35(7):563–78. doi: 10.1177/0333102414552532 (PMC4430584; doi:10.1177/0333102414552532), 2015-06
Supplement: Supplementary_Appendix.pdf [file Supplementary_Appendix.pdf]

# 1 **Supplementary Appendix**

## 2 **Methods**

### 3 *Nonrespondent Survey*

4 A follow-up Nonrespondent Survey was sent to a random sample of 21.6% of panel  
5 members who did not respond to the initial Screening Module. These participants were  
6 recruited using the Screening Module, and completed demographic, headache frequency,  
7 and symptom questions to assess migraine status in order to estimate possible  
8 nonresponse bias. The AMS/AMPP diagnostic module and Silberstein-Lipton CM  
9 criteria were used to make the same modified *ICHD-3b* migraine and Silberstein-  
10 Lipton CM classifications used in the CaMEO sample. Cases not meeting criteria for EM  
11 or CM were treated homogenously, though some might have met criteria for probable  
12 migraine or other non-migraine headache types. Respondents to this survey are referred  
13 to as Nonrespondent Survey respondents.

### 14 **Assessing Nonresponse Bias**

15 To assess nonresponse bias, the CaMEO total respondent sample (whether or not they  
16 met inclusion criteria, including those without fully completed surveys) were compared  
17 with nonrespondents on Research Now panel demographics. In order to fairly assess the  
18 contribution of disease and comorbidity to nonresponse, an additional analysis was  
19 conducted comparing the CaMEO baseline sample (those meeting inclusion criteria) with  
20 the migraine subset of the Nonrespondent Survey respondent sample. Case rates for EM  
21 and CM were also compared between the CaMEO and Nonrespondent Survey respondent  
22 samples.

23 Descriptive and inferential statistics were used to compare nonrespondents with  
24 respondents. Because of the exceedingly large sample sizes in CaMEO, even inferential  
25 tests must be viewed as descriptive as a result of the extreme statistical power inflation.

## 26 **Results**

### 27 *Total Nonrespondent Sample Demographic Differences*

28 Comparing the panel demographics (Research Now panel demographics database) of  
29 the CaMEO total respondent sample (n=80,783) with those of the baseline screener  
30 nonrespondents (n=408,754) found that the groups differed significantly on several  
31 demographic characteristics (**Supplementary Table 1**). However, because of large  
32 sample sizes, all comparisons were over-powered resulting in significant *P* values for  
33 even trivial differences between respondents and nonrespondents. For this reason, we  
34 evaluated Nonrespondent Survey response rates and comparisons to the CaMEO  
35 populations in greater detail, and elected to initiate a re-survey of nonrespondents to more  
36 fully understand the effect of nonresponse (**Supplementary Table 2**).

### 37 *Nonrespondent Survey Response*

38 The Nonrespondent Survey was sent to 88,451 (21.6%) of the baseline nonrespondents  
39 (n=408,754); 8,403 responses were received, and 8,225 of these contained usable data.  
40 The proportion of baseline screener nonrespondents participating and contributing usable  
41 data in this re-survey was 2.0% (8,225/408,754) of the total nonrespondent pool, and  
42 9.3% (8,225/88,451) of those invited. The migraine case rate was slightly lower among  
43 CaMEO respondents (28.7% [16,789/58,418]; **Figure 1**) than Nonrespondent Survey  
44 respondents (33.3% [2,737/8,225]). Criteria for EM were met by 26.2% (15,313/58,418)

45 of respondents versus 31.3% (2,576/8,225) of the Nonrespondent Survey sample, and  
46 2.5% (1,476/58,418) of CaMEO respondents met criteria for CM versus 2.0%  
47 (161/8,225) of the Nonrespondent Survey sample. Of the CaMEO respondents  
48 (n=16,789), 91.2% met criteria for EM and 8.8% met CM criteria (**Figure 1**); of the  
49 Nonrespondent Survey sample with migraine (n=2,737), 94.1% and 5.9%, respectively,  
50 met EM and CM criteria. Because of the brief nature of the re-survey, the completion  
51 time inclusion criterion applied to CaMEO respondents was not applied to nonrespondent  
52 re-survey completers, nor were the past year headache and migraine inclusion criteria,  
53 though all other CaMEO inclusion criteria were applied.

54 As with the comparison of CaMEO total respondent sample and baseline screener  
55 nonrespondent panel demographics, comparison of the migraine subset of the  
56 Nonrespondent Survey respondent sample (n=2,737) and CaMEO respondents  
57 (n=16,789) revealed exaggerated significance caused by the large sample sizes  
58 (**Supplementary Table 2**). Even for trivial magnitudes of difference, relatively large and  
59 significant odds ratios were observed; we therefore deemphasize these differences. An  
60 additional bootstrap analysis (available upon request) was conducted, which demonstrates  
61 that under repeated sampling of reasonably sized samples, these same differences are  
62 statistically non-significant.

63 **Supplementary Tables**

64 **Supplementary Table 1. Demographic Comparison of Nonrespondents From the**  
 65 **Research Now Panel Data and CaMEO Respondents\***

| <b>Characteristic</b>                                         | <b>Nonrespondent*<br/>(N=408,754)</b> | <b>CaMEO<br/>Respondent<br/>(N=80,783)</b> | <b>Respondents vs<br/>Nonrespondents</b>       |                            |
|---------------------------------------------------------------|---------------------------------------|--------------------------------------------|------------------------------------------------|----------------------------|
|                                                               |                                       |                                            | <b>Point Estimate<br/>(95% CI)<sup>‡</sup></b> | <b>P value<sup>†</sup></b> |
| Age (years), mean (SD)                                        | 39.2 (14.7)                           | 45.8 (16.6)                                | 6.65 (6.54–6.77)                               | <0.001                     |
| Female, n (%) <sup>§</sup>                                    | 232,996 (57.0)                        | 47,480 (58.8)                              | 1.08 (1.06–1.09)                               | <0.001                     |
| Race, n (%) <sup>§</sup>                                      |                                       |                                            |                                                |                            |
| White                                                         | 262,340 (65.8)                        | 60,216 (76.2)                              | 1.67 (1.64–1.70)                               | <0.001                     |
| Married, n (%) <sup>§</sup>                                   | 187,923 (46.7)                        | 44,015 (54.8)                              | 1.38 (1.36–1.40)                               | <0.001                     |
| Employed, n (%) <sup>§</sup>                                  | 250,173 (61.7)                        | 45,170 (56.2)                              | 0.80 (0.79–0.81)                               | <0.001                     |
| Annual household income<br>above median, n (%) <sup>§  </sup> | 113,648 (30.5)                        | 28,440 (38.3)                              | 1.42 (1.40–1.44)                               | <0.001                     |

66 \*Data are from Research Now panel demographics database and compared with the total number of returns  
 67 before data cleaning (n=80,783).

68 †Continuous variable contrasts based on *t* test for mean difference; binary variable contrasted based on  
 69 logistic regression odds ratio for difference in proportions.

70 ‡All point estimates are odds ratios, except for age, which is mean difference.

71 §Reference values are men, other race, not married/civil union, not employed full-time/part-time, and  
 72 annual household income ≤ median income bracket (\$50,000–\$74,999).

73 ||Above median household income of the Research Now panel demographics.

74 **Supplementary Table 2. Demographics of the Migraine-Only Nonrespondent Survey Population and CaMEO Respondents**

| Characteristic                                               | Migraine NRS<br>Subpopulation<br>(N=2,737) | CaMEO<br>Respondents<br>(N=16,789) | Respondents vs Migraine NRS Population |         |
|--------------------------------------------------------------|--------------------------------------------|------------------------------------|----------------------------------------|---------|
|                                                              |                                            |                                    | Point Estimate<br>(95% CI)             | P value |
| <i>Demographics</i>                                          |                                            |                                    |                                        |         |
| Age (years), mean (SD)*                                      | 40.7 (13.2)                                | 40.7 (14.4)                        | 0.03 (−0.55 to 0.60)                   | 0.93    |
| Female, n (%) <sup>†,  </sup>                                | 1,975 (72.2)                               | 12,495 (74.4)                      | <b>1.12 (1.03–1.23)</b>                | 0.01    |
| Race, n (%) <sup>†,  </sup>                                  |                                            |                                    |                                        |         |
| White                                                        | 1,904 (71.7)                               | 12,678 (78.5)                      | <b>1.44 (1.31–1.58)</b>                | <0.001  |
| <i>Socioeconomics</i>                                        |                                            |                                    |                                        |         |
| Married/civil union, n (%) <sup>†,  </sup>                   | 1,329 (48.7)                               | 8,136 (48.6)                       | 1.00 (0.92–1.08)                       | 0.94    |
| Education, ≥Bachelors degree, n (%) <sup>†,  </sup>          | 1,130 (41.3)                               | 8,724 (52.0)                       | <b>1.54 (1.42–1.67)</b>                | <0.001  |
| Current employment, full or part-time, n (%) <sup>†,  </sup> | 1,713 (62.6)                               | 9,896 (58.9)                       | <b>0.86 (0.79–0.93)</b>                | <0.001  |
| Annual household income ≥median, n (%) <sup>†,§,  </sup>     | 1,320 (54.8)                               | 9,932 (59.6)                       | <b>1.21 (1.11–1.32)</b>                | <0.001  |
| Annual individual income ≥median, n (%) <sup>†,§,  </sup>    | 980 (39.6)                                 | 6,692 (40.0)                       | 1.02 (0.93–1.11)                       | 0.72    |
| Health insurance, n (%) <sup>†,  </sup>                      | 2,243 (82.0)                               | 14,147 (84.3)                      | <b>1.18 (1.06–1.31)</b>                | 0.002   |
| <i>Headache/medical characteristics</i>                      |                                            |                                    |                                        |         |
| Episodic migraine, n (%) <sup>†,  </sup>                     | 2,576 (94.1)                               | 15,313 (91.2)                      | <b>0.65 (0.55–0.77)</b>                | <0.001  |
| Chronic migraine, n (%) <sup>†,  </sup>                      | 161 (5.9)                                  | 1,476 (8.8)                        | <b>1.54 (1.30–1.82)</b>                | <0.001  |
| Headache days (last 90 days), mean (SD) <sup>‡</sup>         | 12.3 (15.8)                                | 15.1 (18.0)                        | <b>1.23 (1.18–1.29)</b>                | <0.001  |
| Headache days (last 30 days), mean (SD) <sup>‡</sup>         | 3.8 (5.3)                                  | 4.7 (6.0)                          | <b>1.25 (1.20–1.32)</b>                | <0.001  |
| Age of headache onset (years), mean (SD)*                    | 23.1 (11.4)                                | 22.8 (11.6)                        | −0.29 (−0.76 to 0.18)                  | 0.23    |

|                                                           |              |              |                         |        |
|-----------------------------------------------------------|--------------|--------------|-------------------------|--------|
| Zero non-migraine comorbidities,<br>n (%) <sup>†,  </sup> | 1,605 (58.6) | 9,209 (54.9) | <b>0.86 (0.79–0.93)</b> | <0.001 |
|-----------------------------------------------------------|--------------|--------------|-------------------------|--------|

75 ANOVA=analysis of variance; NRS=nonrespondent survey.  
76 \*Modeled as continuous and normal variables. Descriptive statistics are means with SD. Mean difference contrasts and *P* values were obtained from ANOVA.  
77 †Modeled as binary categorical variables. Descriptive statistics are N with %. Odds ratio contrasts and *P* values were obtained from binary logistic regressions.  
78 ‡Modeled as negative binomial counts, associated descriptive statistics are means with SD in parentheses and associated rate ratio contrasts and *P* values were  
79 obtained from negative binomial regressions.  
80 §Individual and household median income estimates for 2012 were obtained from the US census estimates given in the 2013 American Community Survey  
81 Report.  
82 ||Reference values are male, other race, not married/civil union, <Bachelors degree, not employed full-time/part-time, annual household income ≤ median income  
83 bracket, individual household income ≤median income bracket, non-insured individuals, not episodic migraine, not chronic migraine, and have non-migraine  
84 comorbidities present.  
85 Contrasts reported in a bold font are statistically significant at the alpha=0.05 level. Note that of the n=8,245 nonrespondents n=2,745 met criteria for migraine,  
86 but of these n=8 did not match age data and were therefore deleted resulting in an analysis sample of n=2,737.  
87
